# Supplementary material
Source: ML conference proceedings conference paper supplement (https://openaccess.thecvf.com/content/WACV2021/html/Uricar_Lets_Get_Dirty_WACV_2021_paper.html)
Supplement: Supplementary file 1 [file Uricar_Lets_Get_Dirty_WACV_2021_supplemental.zip]

Archive with 12 entries (12 files):
- 01.mp4
- 02.mp4
- 03.mp4
- 04.mp4
- 05.mp4
- 06.mp4
- 07.mp4
- 08.mp4
- 09.mp4
- 10.mp4
- 11.mp4
- 0259-supp.pdf
